# Supplementary material for: Regulation of TAK1/TAB1-Mediated IL-1β Signaling by Cytoplasmic PPARβ/δ
Source: PLoS One. 2013 Apr 30;8(4):e63011. doi: 10.1371/journal.pone.0063011 (PMC3639976; doi:10.1371/journal.pone.0063011)
Supplement: Dataset S4 — Microarray analysis of HeLa cells treated with HSP27, PPARD or control siRNA: complete list of genes inhibited by at least one siRNA (>1.5-fold). (XLS) [file pone.0063011.s018.xls]

## Sheet: DataFrame
Dataset S4. Microarray analysis of HeLa cells treated with siPPARD, siHSP27 or control siRNA:
complete list of genes inhibited by at least one siRNA (>1.5-fold).
stable_id	name	siPPARD effect	fold (log)	siHSP27 effect	fold (log)
ENSG00000187753	C9orf153	uncertain		down	-0.585403
ENSG00000082196	C1QTNF3	no change	0.120622	down	-0.587141
ENSG00000074054	CLASP1	no change	-0.526345	down	-0.587394
ENSG00000089177	KIF16B	no change	0.03772	down	-0.587573
ENSG00000140577	CRTC3	no change	-0.240892	down	-0.588539
ENSG00000176274	MCART6	no change	-0.160391	down	-0.588665
ENSG00000164096	C4orf3	down	-0.62974	down	-0.589857
ENSG00000160961	ZNF333	no change	-0.270701	down	-0.592082
ENSG00000127507	EMR2	no change	-0.270701	down	-0.592082
ENSG00000153113	CAST	no change	0.26158	down	-0.59296
ENSG00000164307	ERAP1	no change	-0.23928	down	-0.59296
ENSG00000165115	KIF27	no change	-0.135926	down	-0.594189
ENSG00000198399	ITSN2	no change	0.24052	down	-0.595684
ENSG00000160791	CCR5	no change	-0.170151	down	-0.596144
ENSG00000229314	ORM1	no change	-0.350615	down	-0.596664
ENSG00000100427	MLC1	no change	0.285054	down	-0.597013
ENSG00000163681	SLMAP	up	0.806091	down	-0.597143
ENSG00000168300	PCMTD1	down	-0.595375	down	-0.598792
ENSG00000206075	SERPINB5	no change	0.572919	down	-0.599279
ENSG00000158050	DUSP2	down	-0.622388	down	-0.599636
ENSG00000149573	MPZL2	no change	0.923906	down	-0.599783
ENSG00000115306	SPTBN1	no change	0.195536	down	-0.600698
ENSG00000228108	AC092839.3	no change	-0.273494	down	-0.600698
ENSG00000156500	FAM122C	no change	-0.164367	down	-0.601095
ENSG00000206066	IGLL3P	no change	-0.32531	down	-0.601259
ENSG00000141314	RHBDL3	no change	-0.159828	down	-0.602114
ENSG00000249859	PVT1	down	-0.62909	down	-0.602396
ENSG00000235823	LINC00263	no change	0.226662	down	-0.605973
ENSG00000139132	FGD4	no change	-0.456756	down	-0.606731
ENSG00000204410	MSH5	no change	-0.564539	down	-0.607292
ENSG00000255152	MSH5-SAPCD1	no change	-0.564539	down	-0.607292
ENSG00000189229	AC069277.2	no change	-0.037792	down	-0.60765
ENSG00000187239	FNBP1	no change	-0.131552	down	-0.612584
ENSG00000151012	SLC7A11	down	-1.62553	down	-0.61734
ENSG00000141551	CSNK1D	no change	0.087156	down	-0.619746
ENSG00000197932	F8A1	no change	0.204271	down	-0.620193
ENSG00000198444	F8A2	no change	0.204271	down	-0.620193
ENSG00000185990	F8A3	no change	0.204271	down	-0.620193
ENSG00000163528	CHCHD4	no change	0.124648	down	-0.621159
ENSG00000080608	KIAA0020	uncertain		down	-0.623822
ENSG00000126217	MCF2L	uncertain		down	-0.623843
ENSG00000083312	TNPO1	no change	-0.519384	down	-0.625076
ENSG00000125845	BMP2	no change	0.18416	down	-0.625465
ENSG00000114648	KLHL18	no change	0.267427	down	-0.626068
ENSG00000171631	P2RY6	no change	-0.0694475	down	-0.62632
ENSG00000153944	MSI2	down	-0.638396	down	-0.626322
ENSG00000085832	EPS15	no change	-0.475338	down	-0.62963
ENSG00000113389	NPR3	no change	-0.984232	down	-0.633706
ENSG00000115364	MRPL19	down	-1.11246	down	-0.634044
ENSG00000005436	GCFC2	down	-1.11246	down	-0.634044
ENSG00000116761	CTH	no change	0.291094	down	-0.634415
ENSG00000221926	TRIM16	no change	-0.577537	down	-0.635411
ENSG00000108448	TRIM16L	no change	-0.577537	down	-0.635411
ENSG00000173068	BNC2	down	-0.770721	down	-0.636275
ENSG00000112245	PTP4A1	no change	0.0359252	down	-0.638211
ENSG00000059728	MXD1	down	-1.26924	down	-0.639487
ENSG00000169242	EFNA1	down	-0.973941	down	-0.640705
ENSG00000224078	SNHG14	no change	-0.104567	down	-0.642037
ENSG00000085063	CD59	no change	-0.329953	down	-0.645415
ENSG00000167874	TMEM88	down	-0.971819	down	-0.64756
ENSG00000184557	SOCS3	down	-0.711359	down	-0.647732
ENSG00000138798	EGF	no change	-0.538146	down	-0.648181
ENSG00000171223	JUNB	down	-0.872495	down	-0.649183
ENSG00000170899	GSTA4	no change	-0.195084	down	-0.649512
ENSG00000114026	OGG1	no change	-0.168031	down	-0.650087
ENSG00000245958	RP11-33B1.1	no change	0.254943	down	-0.650273
ENSG00000011114	BTBD7	down	-0.686155	down	-0.652772
ENSG00000188155	KRTAP10-6	no change	-0.554926	down	-0.653352
ENSG00000139182	CLSTN3	no change	-0.1676	down	-0.654496
ENSG00000196878	LAMB3	no change	-0.187356	down	-0.662272
ENSG00000048471	SNX29	no change	-0.164367	down	-0.66407
ENSG00000160781	PAQR6	no change	-0.486425	down	-0.664397
ENSG00000148219	ASTN2	no change	0.174446	down	-0.665296
ENSG00000257242	RP11-24B21.1	no change	-0.495879	down	-0.667125
ENSG00000260861	RP4-576H24.4	no change	-0.378131	down	-0.667591
ENSG00000101307	SIRPB1	uncertain		down	-0.667591
ENSG00000156273	BACH1	no change	-0.26435	down	-0.667613
ENSG00000204291	COL15A1	no change	-0.010888	down	-0.668862
ENSG00000144655	CSRNP1	down	-0.609173	down	-0.671608
ENSG00000075711	DLG1	down	-0.638404	down	-0.677096
ENSG00000034152	MAP2K3	no change	0.0727349	down	-0.679548
ENSG00000113916	BCL6	down	-0.622365	down	-0.680463
ENSG00000204054	RP11-492E3.1	no change	0.0539126	down	-0.681954
ENSG00000239353	RP11-492E3.51	no change	0.0117955	down	-0.681954
ENSG00000143878	RHOB	no change	0.306225	down	-0.682786
ENSG00000005893	LAMP2	down	-1.06109	down	-0.684654
ENSG00000171451	DSEL	down	-0.850793	down	-0.686529
ENSG00000101935	AMMECR1	no change	-0.139051	down	-0.68739
ENSG00000168958	MFF	no change	0.0362737	down	-0.68865
ENSG00000229729	RP11-159G9.5	no change	-0.381129	down	-0.689269
ENSG00000163320	CGGBP1	no change	-0.537094	down	-0.689269
ENSG00000149380	P4HA3	no change	-0.278677	down	-0.689565
ENSG00000189372	RP6-149D17.1	uncertain		down	-0.690026
ENSG00000176907	C8orf4	down	-0.74953	down	-0.690419
ENSG00000203813	HIST1H3H	no change	-0.110257	down	-0.690678
ENSG00000101294	HM13	no change	-0.0358911	down	-0.690793
ENSG00000157703	SVOPL	no change	0.249014	down	-0.694438
ENSG00000211677	IGLC2	no change	-0.228187	down	-0.696601
ENSG00000175287	PHYHD1	no change	-0.160391	down	-0.70335
ENSG00000104714	ERICH1	uncertain		down	-0.704511
ENSG00000223745	RP4-717I23.3	no change	-0.170897	down	-0.704546
ENSG00000176124	DLEU1	no change	0.329659	down	-0.7064
ENSG00000231607	DLEU2	no change	0.0973564	down	-0.7064
ENSG00000107863	ARHGAP21	no change	-0.27931	down	-0.708637
ENSG00000013619	MAMLD1	no change	0.305549	down	-0.709358
ENSG00000185950	IRS2	no change	-0.253658	down	-0.710753
ENSG00000112541	PDE10A	no change	0.095699	down	-0.710925
ENSG00000221944	TIGD1	down	-0.643193	down	-0.711211
ENSG00000171105	INSR	down	-0.655874	down	-0.71471
ENSG00000151150	ANK3	uncertain		down	-0.715031
ENSG00000138100	TRIM54	no change	-0.421964	down	-0.715576
ENSG00000163719	MTMR14	no change	0.108586	down	-0.718366
ENSG00000197157	SND1	no change	-0.0456515	down	-0.720013
ENSG00000088280	ASAP3	no change	0.189744	down	-0.721585
ENSG00000251562	MALAT1	no change	-0.308491	down	-0.725163
ENSG00000079691	LRRC16A	no change	0.161836	down	-0.725411
ENSG00000069974	RAB27A	no change	-0.495031	down	-0.727654
ENSG00000165240	ATP7A	down	-0.952488	down	-0.731361
ENSG00000142178	SIK1	no change	-0.546749	down	-0.736232
ENSG00000170293	CMTM8	no change	-0.367143	down	-0.738479
ENSG00000146166	LGSN	no change	-0.224501	down	-0.739548
ENSG00000228649	AC005682.5	no change	-0.33812	down	-0.739919
ENSG00000068305	MEF2A	no change	-0.112067	down	-0.740175
ENSG00000183060	LYSMD4	no change	-0.112067	down	-0.740175
ENSG00000214397	AC022692.1	no change	-0.112067	down	-0.740175
ENSG00000258365	RP11-1105G2.3	no change	-0.175116	down	-0.741148
ENSG00000163539	CLASP2	no change	0.0587283	down	-0.74484
ENSG00000138166	DUSP5	down	-1.02577	down	-0.749146
ENSG00000082684	SEMA5B	uncertain		down	-0.749808
ENSG00000144061	NPHP1	no change	0.0145048	down	-0.750143
ENSG00000135525	MAP7	no change	0.561209	down	-0.751198
ENSG00000238097	RP11-513G11.3	uncertain		down	-0.752916
ENSG00000122641	INHBA	down	-0.68675	down	-0.754119
ENSG00000125347	IRF1	down	-0.905715	down	-0.754384
ENSG00000163132	MSX1	no change	0.258441	down	-0.759502
ENSG00000102531	FNDC3A	no change	-0.432732	down	-0.765244
ENSG00000009413	REV3L	uncertain		down	-0.765612
ENSG00000232995	RP11-267N12.3	down	-0.697393	down	-0.768126
ENSG00000143228	NUF2	uncertain		down	-0.768126
ENSG00000180537	RNF182	no change	0.233049	down	-0.770056
ENSG00000075651	PLD1	down	-0.830963	down	-0.773413
ENSG00000259220	RP11-702L15.2	uncertain		down	-0.774983
ENSG00000102287	GABRE	no change	0.00785354	down	-0.77662
ENSG00000073150	PANX2	down	-0.708004	down	-0.780919
ENSG00000139370	SLC15A4	no change	0.0683707	down	-0.782199
ENSG00000115935	WIPF1	uncertain		down	-0.784534
ENSG00000119411	BSPRY	no change	-0.311771	down	-0.788469
ENSG00000198585	NUDT16	no change	-0.201948	down	-0.792251
ENSG00000108292	MLLT6	no change	-0.375421	down	-0.792805
ENSG00000112149	CD83	down	-0.811459	down	-0.798617
ENSG00000215196	AC091878.1	no change	0.145126	down	-0.800005
ENSG00000233828	AC008394.1	no change	-0.545343	down	-0.806459
ENSG00000094916	CBX5	up	0.641267	down	-0.809967
ENSG00000162599	NFIA	down	-0.747471	down	-0.810525
ENSG00000253669	KB-1732A1.1	no change	-0.164367	down	-0.815414
ENSG00000215021	PHB2	no change	-0.0981319	down	-0.815466
ENSG00000153317	ASAP1	down	-0.671287	down	-0.816633
ENSG00000108984	MAP2K6	no change	-0.24156	down	-0.817322
ENSG00000144476	CXCR7	no change	0.371862	down	-0.817848
ENSG00000251615	RP11-774O3.3	no change	-0.209216	down	-0.817879
ENSG00000119771	KLHL29	uncertain		down	-0.826275
ENSG00000131471	AOC3	no change	-0.260415	down	-0.832756
ENSG00000154930	ACSS1	no change	-0.288652	down	-0.841857
ENSG00000127954	STEAP4	no change	-0.0546721	down	-0.851513
ENSG00000109911	ELP4	no change	-0.164367	down	-0.853242
ENSG00000227502	RP1-249H1.4	no change	-0.171933	down	-0.856628
ENSG00000159388	BTG2	down	-1.23122	down	-0.856775
ENSG00000177556	ATOX1	no change	0.127824	down	-0.863397
ENSG00000162772	ATF3	down	-1.31186	down	-0.864063
ENSG00000173517	PEAK1	down	-0.592895	down	-0.86963
ENSG00000160888	IER2	down	-1.45605	down	-0.873448
ENSG00000165006	UBAP1	no change	-0.0347498	down	-0.876718
ENSG00000232645	RP3-322G13.5	no change	-0.156969	down	-0.879441
ENSG00000152127	MGAT5	no change	-0.146082	down	-0.884103
ENSG00000117115	PADI2	uncertain		down	-0.884621
ENSG00000120129	DUSP1	down	-0.911964	down	-0.8857
ENSG00000148730	EIF4EBP2	down	-0.596527	down	-0.889082
ENSG00000214293	AC090421.1	no change	0.301	down	-0.889133
ENSG00000163739	CXCL1	down	-1.09724	down	-0.889892
ENSG00000204529	RP11-672A2.2	no change	-0.529678	down	-0.891263
ENSG00000249628	RP3-340I3.1	down	-0.846994	down	-0.892129
ENSG00000165995	CACNB2	no change	-0.164367	down	-0.896963
ENSG00000135744	AGT	up	1.20969	down	-0.900491
ENSG00000009950	MLXIPL	no change	-0.164367	down	-0.902338
ENSG00000118495	PLAGL1	no change	-0.386555	down	-0.918134
ENSG00000204272	RP11-622K12.1	down	-0.873116	down	-0.919318
ENSG00000103257	SLC7A5	no change	-0.187807	down	-0.923826
ENSG00000226380	AC058791.1	down	-0.94964	down	-0.932436
ENSG00000212747	FAM127C	no change	-0.195751	down	-0.937166
ENSG00000230590	FTX	down	-0.678124	down	-0.937523
ENSG00000169429	IL8	down	-1.59006	down	-0.942066
ENSG00000081041	CXCL2	down	-1.16803	down	-0.943491
ENSG00000206077	ZDHHC11B	no change	-0.362784	down	-0.945449
ENSG00000205403	CFI	no change	0.313954	down	-0.960704
ENSG00000188818	ZDHHC11	no change	-0.375128	down	-0.961862
ENSG00000233559	AC016831.7	down	-1.00552	down	-0.978186
ENSG00000139645	ANKRD52	no change	-0.530362	down	-0.982865
ENSG00000251003	RP11-152P17.2	down	-1.17742	down	-0.988351
ENSG00000188505	NCCRP1	no change	0.0149607	down	-0.991651
ENSG00000179912	R3HDM2	no change	-0.212043	down	-0.991708
ENSG00000253428	CTB-43E15.2	no change	0.0138045	down	-0.995671
ENSG00000253686	CTB-43E15.3	no change	-0.632605	down	-0.995671
ENSG00000128482	RNF112	no change	-0.0505566	down	-1.00272
ENSG00000237763	AMY1A	down	-0.70738	down	-1.01441
ENSG00000174876	AMY1B	down	-0.70738	down	-1.01441
ENSG00000187733	AMY1C	down	-0.70738	down	-1.01441
ENSG00000166340	TPP1	no change	0.198859	down	-1.02884
ENSG00000165197	FIGF	down	-0.726762	down	-1.03101
ENSG00000173545	ZNF622	no change	0.0557214	down	-1.03709
ENSG00000113448	PDE4D	no change	-0.249812	down	-1.03725
ENSG00000167522	ANKRD11	no change	0.167687	down	-1.04279
ENSG00000112096	SOD2	down	-0.83197	down	-1.04687
ENSG00000146457	WTAP	down	-0.83197	down	-1.04687
ENSG00000106927	AMBP	no change	-0.4748	down	-1.05631
ENSG00000227471	AKR1B15	no change	-0.150138	down	-1.05945
ENSG00000055955	ITIH4	no change	0.329802	down	-1.06243
ENSG00000243696	MUSTN1	no change	0.243206	down	-1.06243
ENSG00000102181	CD99L2	no change	-0.533497	down	-1.06358
ENSG00000203772	SPRN	down	-0.741302	down	-1.06599
ENSG00000180875	GREM2	no change	-0.198463	down	-1.06822
ENSG00000128016	ZFP36	down	-1.56158	down	-1.07943
ENSG00000179388	EGR3	down	-1.68312	down	-1.07978
ENSG00000171557	FGG	down	-0.682901	down	-1.07995
ENSG00000163295	ALPI	no change	0.176022	down	-1.0877
ENSG00000211689	TRGC1	no change	-0.0304325	down	-1.08913
ENSG00000163734	CXCL3	down	-1.25723	down	-1.10786
ENSG00000228492	RAB11FIP1P1	down	-0.979299	down	-1.10905
ENSG00000139445	FOXN4	down	-0.946183	down	-1.10943
ENSG00000185112	FAM43A	down	-0.602896	down	-1.12457
ENSG00000006611	USH1C	up	0.665669	down	-1.12674
ENSG00000136244	IL6	down	-1.19514	down	-1.13547
ENSG00000104760	FGL1	no change	0.240973	down	-1.14273
ENSG00000197555	SIPA1L1	down	-1.13217	down	-1.15218
ENSG00000160183	TMPRSS3	down	-0.919425	down	-1.15768
ENSG00000182240	BACE2	down	-0.919425	down	-1.15768
ENSG00000124882	EREG	down	-0.962511	down	-1.15838
ENSG00000260527	RP11-73O6.4	down	-0.703521	down	-1.16151
ENSG00000115009	CCL20	down	-1.65801	down	-1.22184
ENSG00000198074	AKR1B10	no change	0.0227729	down	-1.24866
ENSG00000120738	EGR1	down	-2.10077	down	-1.25713
ENSG00000116690	PRG4	down	-0.817429	down	-1.26106
ENSG00000244731	C4A	no change	0.232598	down	-1.27926
ENSG00000224389	C4B	no change	0.232598	down	-1.27926
ENSG00000063046	EIF4B	no change	-0.161934	down	-1.29915
ENSG00000245532	NEAT1	down	-0.945539	down	-1.3015
ENSG00000185736	ADARB2	down	-0.667525	down	-1.31141
ENSG00000189067	LITAF	no change	-0.0851504	down	-1.32457
ENSG00000078018	MAP2	no change	0.00147803	down	-1.34119
ENSG00000109321	AREG	no change	-0.0693311	down	-1.36384
ENSG00000205595	AREGB	no change	-0.0693311	down	-1.36384
ENSG00000014824	SLC30A9	no change	-0.0515729	down	-1.39771
ENSG00000256956	RP11-252P19.3	down	-0.837993	down	-1.41165
ENSG00000106211	HSPB1	no change	-0.2701	down	-1.41938
ENSG00000105835	NAMPT	down	-1.12512	down	-1.43348
ENSG00000123610	TNFAIP6	no change	-0.953153	down	-1.43521
ENSG00000120211	INSL4	no change	0.0957086	down	-1.43638
ENSG00000170345	FOS	down	-1.59364	down	-1.46045
ENSG00000234790	RP11-426L16.7	no change	0.0369094	down	-1.46336
ENSG00000100292	HMOX1	down	-1.37758	down	-1.49199
ENSG00000153234	NR4A2	down	-1.03444	down	-1.49359
ENSG00000102898	NUTF2	no change	0.0473791	down	-1.49427
ENSG00000073756	PTGS2	down	-1.3906	down	-1.52483
ENSG00000122877	EGR2	down	-2.23023	down	-1.53486
ENSG00000125740	FOSB	down	-2.19744	down	-1.54799
ENSG00000187479	C11orf96	down	-1.89873	down	-1.54827
ENSG00000244953	RP11-613D13.8	down	-1.89873	down	-1.54827
ENSG00000123358	NR4A1	down	-1.66838	down	-1.57602
ENSG00000259884	RP11-1100L3.8	down	-1.66838	down	-1.57602
ENSG00000171658	RP11-443P15.2	down	-1.91979	down	-1.67635
ENSG00000169297	NR0B1	down	-1.65834	down	-1.70137
ENSG00000187134	AKR1C1	down	-1.09058	down	-1.71527
ENSG00000198610	AKR1C4	down	-1.12388	down	-1.73147
ENSG00000119508	NR4A3	down	-1.14809	down	-1.84598
ENSG00000068078	FGFR3	down	-0.88423	no change	0.482918
ENSG00000163083	INHBB	down	-1.20946	no change	0.467263
ENSG00000123575	FAM199X	down	-0.666647	no change	0.448949
ENSG00000106366	SERPINE1	down	-1.15785	no change	0.427969
ENSG00000073464	CLCN4	down	-0.606205	no change	0.421701
ENSG00000198682	PAPSS2	down	-0.686168	no change	0.406632
ENSG00000204899	MZT1	down	-0.707919	no change	0.388997
ENSG00000232941	AC090186.1	down	-0.595375	no change	0.388262
ENSG00000101384	JAG1	down	-0.611798	no change	0.356672
ENSG00000138448	ITGAV	down	-1.01372	no change	0.353456
ENSG00000212901	KRTAP3-1	down	-0.646974	no change	0.353255
ENSG00000163714	U2SURP	down	-0.711655	no change	0.349131
ENSG00000074696	PTPLAD1	down	-0.775009	no change	0.336188
ENSG00000080709	KCNN2	down	-0.590125	no change	0.323069
ENSG00000169714	CNBP	down	-0.751439	no change	0.318426
ENSG00000117525	F3	down	-0.86809	no change	0.312188
ENSG00000258441	CTD-2552B11.4	down	-0.623703	no change	0.311433
ENSG00000232810	TNF	down	-1.12768	no change	0.298958
ENSG00000138685	FGF2	down	-0.739043	no change	0.294299
ENSG00000166479	TMX3	down	-0.888979	no change	0.287176
ENSG00000146678	IGFBP1	down	-1.22908	no change	0.286764
ENSG00000155189	AGPAT5	down	-0.843286	no change	0.284649
ENSG00000049759	NEDD4L	down	-1.32216	no change	0.282854
ENSG00000112697	TMEM30A	down	-0.697309	no change	0.282361
ENSG00000198380	GFPT1	down	-0.86093	no change	0.277481
ENSG00000109790	KLHL5	down	-0.673514	no change	0.261249
ENSG00000111799	COL12A1	down	-0.634206	no change	0.257425
ENSG00000057019	DCBLD2	down	-1.29218	no change	0.255526
ENSG00000198825	INPP5F	down	-0.82146	no change	0.252702
ENSG00000259076	RP11-973N13.3	down	-0.594674	no change	0.242513
ENSG00000118965	WDR35	down	-0.59507	no change	0.239031
ENSG00000075420	FNDC3B	down	-0.885238	no change	0.226348
ENSG00000109586	GALNT7	down	-1.17332	no change	0.223151
ENSG00000186432	KPNA4	down	-1.023	no change	0.222201
ENSG00000196937	FAM3C	down	-0.737528	no change	0.219858
ENSG00000156535	CD109	down	-0.923506	no change	0.215612
ENSG00000104660	LEPROTL1	down	-0.763295	no change	0.215585
ENSG00000111846	GCNT2	down	-0.654898	no change	0.215217
ENSG00000150093	ITGB1	down	-0.734189	no change	0.211755
ENSG00000163577	EIF5A2	down	-0.964666	no change	0.207971
ENSG00000157240	FZD1	down	-0.606008	no change	0.195665
ENSG00000092208	GEMIN2	down	-0.700904	no change	0.189201
ENSG00000134247	PTGFRN	down	-1.17975	no change	0.188869
ENSG00000169891	REPS2	down	-1.35419	no change	0.177804
ENSG00000108932	SLC16A6	down	-0.75164	no change	0.176939
ENSG00000259634	RP11-529H20.5	down	-0.821434	no change	0.175841
ENSG00000165799	RNASE7	down	-0.600078	no change	0.171666
ENSG00000183049	CAMK1D	down	-0.651917	no change	0.171539
ENSG00000115993	TRAK2	down	-0.78562	no change	0.168872
ENSG00000185842	DNAH14	down	-0.645388	no change	0.16683
ENSG00000007168	PAFAH1B1	down	-0.602068	no change	0.166046
ENSG00000162639	HENMT1	down	-1.0173	no change	0.162911
ENSG00000180398	MCFD2	down	-0.704906	no change	0.157142
ENSG00000104763	ASAH1	down	-0.667188	no change	0.156954
ENSG00000169504	CLIC4	down	-0.594471	no change	0.148036
ENSG00000125977	EIF2S2	down	-0.660714	no change	0.147545
ENSG00000125089	SH3TC1	down	-0.733344	no change	0.146836
ENSG00000152558	TMEM123	down	-1.08951	no change	0.141934
ENSG00000100271	TTLL1	down	-0.779456	no change	0.14068
ENSG00000154429	C1orf96	down	-0.922431	no change	0.139184
ENSG00000177565	TBL1XR1	down	-0.739357	no change	0.137767
ENSG00000119729	RHOQ	down	-0.797963	no change	0.136358
ENSG00000135404	CD63	down	-0.698361	no change	0.135779
ENSG00000163069	SGCB	down	-0.715099	no change	0.129878
ENSG00000173276	ZNF295	down	-0.616521	no change	0.125266
ENSG00000133818	RRAS2	down	-0.866257	no change	0.123204
ENSG00000142166	IFNAR1	down	-1.29146	no change	0.112249
ENSG00000024526	DEPDC1	down	-0.74713	no change	0.11009
ENSG00000172380	GNG12	down	-0.765176	no change	0.107918
ENSG00000136444	RSAD1	down	-0.641405	no change	0.10693
ENSG00000163251	FZD5	down	-0.667739	no change	0.106628
ENSG00000166454	ATMIN	down	-0.769592	no change	0.101607
ENSG00000107562	CXCL12	down	-0.637624	no change	0.101511
ENSG00000065600	TMEM206	down	-0.794199	no change	0.100816
ENSG00000136813	KIAA0368	down	-0.750016	no change	0.0959145
ENSG00000203667	COX20	down	-0.987503	no change	0.0919732
ENSG00000154153	FAM134B	down	-0.872515	no change	0.0913264
ENSG00000119314	PTBP3	down	-0.69758	no change	0.0866861
ENSG00000186298	PPP1CC	down	-0.787913	no change	0.085721
ENSG00000164930	FZD6	down	-1.05972	no change	0.0821108
ENSG00000119638	NEK9	down	-0.660507	no change	0.0786781
ENSG00000100941	PNN	down	-0.872473	no change	0.0747025
ENSG00000091317	CMTM6	down	-0.760325	no change	0.0733968
ENSG00000120137	PANK3	down	-0.687549	no change	0.0722533
ENSG00000174100	MRPL45	down	-0.832722	no change	0.0715207
ENSG00000198743	SLC5A3	down	-0.81647	no change	0.0670991
ENSG00000059145	UNKL	down	-0.636253	no change	0.0642233
ENSG00000152795	HNRPDL	down	-0.636943	no change	0.06189
ENSG00000188312	CENPP	down	-0.812341	no change	0.0601723
ENSG00000106868	SUSD1	down	-0.881218	no change	0.0584025
ENSG00000231721	AC058791.2	down	-0.961585	no change	0.0559612
ENSG00000057663	ATG5	down	-0.737191	no change	0.0524314
ENSG00000157869	RAB28	down	-0.806229	no change	0.0506123
ENSG00000112685	EXOC2	down	-0.887209	no change	0.0503853
ENSG00000101557	USP14	down	-0.70435	no change	0.0484508
ENSG00000135679	MDM2	down	-1.01591	no change	0.0427655
ENSG00000173230	GOLGB1	down	-0.610448	no change	0.0422658
ENSG00000114978	MOB1A	down	-0.606564	no change	0.0396552
ENSG00000196182	STK40	down	-0.765639	no change	0.0336203
ENSG00000213672	NCKIPSD	down	-0.73845	no change	0.0290987
ENSG00000158201	ABHD3	down	-0.71306	no change	0.0267781
ENSG00000132326	PER2	down	-0.698993	no change	0.024545
ENSG00000179295	PTPN11	down	-0.763496	no change	0.0151152
ENSG00000256439	AC008731.1	down	-0.728568	no change	0.0143522
ENSG00000078401	EDN1	down	-1.28896	no change	0.0142858
ENSG00000119125	GDA	down	-0.82014	no change	0.0124447
ENSG00000113721	PDGFRB	down	-0.735675	no change	0.012261
ENSG00000172071	EIF2AK3	down	-0.651856	no change	0.0100985
ENSG00000078674	PCM1	down	-0.688623	no change	0.0088721
ENSG00000221988	PPT2	down	-0.891365	no change	0.00838924
ENSG00000105397	TYK2	down	-0.611993	no change	0.00653699
ENSG00000163430	FSTL1	down	-1.58992	no change	0.00617484
ENSG00000196922	ZNF252	down	-1.12672	no change	0.00584689
ENSG00000177706	FAM20C	down	-0.636912	no change	0.00375255
ENSG00000117906	RCN2	down	-0.708563	no change	0.00374986
ENSG00000183943	PRKX	down	-0.664516	no change	0.0010731
ENSG00000011405	PIK3C2A	down	-1.16935	no change	-0.00241849
ENSG00000170348	TMED10	down	-1.0478	no change	-0.00583916
ENSG00000163600	ICOS	down	-0.592374	no change	-0.00875131
ENSG00000135823	STX6	down	-0.874241	no change	-0.0107413
ENSG00000100697	DICER1	down	-0.944452	no change	-0.0108147
ENSG00000233426	EIF3FP3	down	-0.873231	no change	-0.0126733
ENSG00000023287	RB1CC1	down	-0.613231	no change	-0.0133315
ENSG00000147889	CDKN2A	down	-0.60668	no change	-0.0152197
ENSG00000184886	PIGW	down	-0.589206	no change	-0.0157306
ENSG00000109762	SNX25	down	-0.680381	no change	-0.016419
ENSG00000185090	MANEAL	down	-0.592789	no change	-0.0176311
ENSG00000143436	MRPL9	down	-0.709863	no change	-0.0177986
ENSG00000112144	ICK	down	-0.616497	no change	-0.0217739
ENSG00000123213	NLN	down	-0.740353	no change	-0.0228223
ENSG00000107771	FAM190B	down	-0.655271	no change	-0.0267546
ENSG00000171208	NETO2	down	-1.17467	no change	-0.0268272
ENSG00000260456	C16orf95	down	-0.854259	no change	-0.0284088
ENSG00000168994	PXDC1	down	-0.714639	no change	-0.0288467
ENSG00000164338	UTP15	down	-1.06065	no change	-0.0288831
ENSG00000058063	ATP11B	down	-0.645984	no change	-0.0298194
ENSG00000009830	POMT2	down	-0.683406	no change	-0.0312385
ENSG00000196950	SLC39A10	down	-0.634767	no change	-0.0318655
ENSG00000169379	ARL13B	down	-0.858536	no change	-0.033889
ENSG00000257093	KIAA1147	down	-0.926666	no change	-0.0431282
ENSG00000108582	CPD	down	-0.798955	no change	-0.0470657
ENSG00000118762	PKD2	down	-0.906348	no change	-0.0485277
ENSG00000164287	CDC20B	down	-0.984912	no change	-0.0523845
ENSG00000166173	LARP6	down	-0.985072	no change	-0.0567304
ENSG00000173349	SFT2D3	down	-0.840573	no change	-0.0618954
ENSG00000119396	RAB14	down	-0.619862	no change	-0.0673653
ENSG00000173391	OLR1	down	-1.03325	no change	-0.0681922
ENSG00000170903	MSANTD4	down	-0.810286	no change	-0.0705837
ENSG00000117479	SLC19A2	down	-0.854645	no change	-0.0712024
ENSG00000142864	SERBP1	down	-0.628477	no change	-0.0718946
ENSG00000163812	ZDHHC3	down	-0.74949	no change	-0.0721469
ENSG00000138821	SLC39A8	down	-0.856941	no change	-0.0788666
ENSG00000110852	CLEC2B	down	-0.651739	no change	-0.0805036
ENSG00000130024	PHF10	down	-0.744576	no change	-0.0805506
ENSG00000185129	PURA	down	-0.597881	no change	-0.0834287
ENSG00000165175	MID1IP1	down	-0.60676	no change	-0.0837739
ENSG00000235194	PPP1R3E	down	-0.585918	no change	-0.0854274
ENSG00000128463	TMEM85	down	-0.636674	no change	-0.0866171
ENSG00000133687	TMTC1	down	-0.709269	no change	-0.0897786
ENSG00000137509	PRCP	down	-0.618759	no change	-0.0912709
ENSG00000152332	UHMK1	down	-0.960801	no change	-0.0912814
ENSG00000099250	NRP1	down	-0.660503	no change	-0.0919871
ENSG00000047056	WDR37	down	-0.660743	no change	-0.0923386
ENSG00000198887	SMC5	down	-0.785008	no change	-0.0958547
ENSG00000109436	TBC1D9	down	-0.737432	no change	-0.0964732
ENSG00000215719	AL356585.3	down	-0.597898	no change	-0.0968294
ENSG00000157193	LRP8	down	-0.626413	no change	-0.0975768
ENSG00000159658	KIAA0494	down	-0.614773	no change	-0.0996788
ENSG00000144747	TMF1	down	-0.618757	no change	-0.100786
ENSG00000092621	PHGDH	down	-0.604124	no change	-0.10356
ENSG00000139168	ZCRB1	down	-1.32643	no change	-0.109533
ENSG00000188206	HNRNPU-AS1	down	-0.83779	no change	-0.109849
ENSG00000139496	NUPL1	down	-0.73231	no change	-0.111569
ENSG00000114770	ABCC5	down	-0.750836	no change	-0.11339
ENSG00000102174	PHEX	down	-0.837331	no change	-0.114782
ENSG00000028528	SNX1	down	-0.615496	no change	-0.115186
ENSG00000003436	TFPI	down	-0.951796	no change	-0.118335
ENSG00000141298	SSH2	down	-0.695566	no change	-0.120882
ENSG00000159231	CBR3	down	-0.686924	no change	-0.122846
ENSG00000147400	CETN2	down	-0.97244	no change	-0.124972
ENSG00000158850	B4GALT3	down	-0.638365	no change	-0.127684
ENSG00000021762	OSBPL5	down	-0.703545	no change	-0.127803
ENSG00000123095	BHLHE41	down	-0.624956	no change	-0.131799
ENSG00000162496	DHRS3	down	-1.38279	no change	-0.13369
ENSG00000182700	IGIP	down	-0.792684	no change	-0.137342
ENSG00000103241	FOXF1	down	-0.905065	no change	-0.138174
ENSG00000169239	CA5B	down	-1.2084	no change	-0.140275
ENSG00000080822	CLDND1	down	-0.83362	no change	-0.141583
ENSG00000145743	FBXL17	down	-0.596982	no change	-0.142721
ENSG00000107560	RAB11FIP2	down	-0.71364	no change	-0.145773
ENSG00000138604	GLCE	down	-1.14328	no change	-0.14626
ENSG00000108691	CCL2	down	-0.730517	no change	-0.15083
ENSG00000255996	RP11-429A20.2	down	-0.89129	no change	-0.153734
ENSG00000131979	GCH1	down	-0.801579	no change	-0.154577
ENSG00000112033	PPARD	down	-1.49953	no change	-0.156839
ENSG00000188707	C7orf29	down	-0.714619	no change	-0.159691
ENSG00000153250	RBMS1	down	-0.867357	no change	-0.161431
ENSG00000105810	CDK6	down	-0.785547	no change	-0.171056
ENSG00000096746	HNRNPH3	down	-0.746687	no change	-0.174278
ENSG00000174238	PITPNA	down	-0.784153	no change	-0.174926
ENSG00000162290	DCP1A	down	-0.631506	no change	-0.176856
ENSG00000254673	RP11-598P20.5	down	-0.624342	no change	-0.186065
ENSG00000117899	MESDC2	down	-0.760227	no change	-0.190504
ENSG00000161267	BDH1	down	-0.592551	no change	-0.19109
ENSG00000070404	FSTL3	down	-0.696407	no change	-0.191121
ENSG00000168743	NPNT	down	-0.638225	no change	-0.191591
ENSG00000249437	NAIP	down	-0.618312	no change	-0.199591
ENSG00000225400	RP11-1114A5.5	down	-0.75965	no change	-0.201891
ENSG00000115159	GPD2	down	-0.888199	no change	-0.204925
ENSG00000108846	ABCC3	down	-0.69035	no change	-0.205647
ENSG00000114383	TUSC2	down	-0.62748	no change	-0.212934
ENSG00000137845	ADAM10	down	-0.985925	no change	-0.216797
ENSG00000205133	C8orf83	down	-0.808092	no change	-0.221014
ENSG00000164603	C7orf60	down	-0.71092	no change	-0.224904
ENSG00000198890	PRMT6	down	-0.738946	no change	-0.227088
ENSG00000119414	PPP6C	down	-0.671556	no change	-0.230934
ENSG00000133104	SPG20	down	-0.672851	no change	-0.235277
ENSG00000177606	JUN	down	-0.969827	no change	-0.235418
ENSG00000262454	RP11-65J21.3	down	-0.672257	no change	-0.238291
ENSG00000139324	TMTC3	down	-0.658712	no change	-0.245211
ENSG00000015153	YAF2	down	-0.639872	no change	-0.24665
ENSG00000100664	EIF5	down	-0.603737	no change	-0.247588
ENSG00000177156	TALDO1	down	-0.638262	no change	-0.247724
ENSG00000261602	CTD-2033A16.1	down	-1.17553	no change	-0.253014
ENSG00000118849	RARRES1	down	-0.617269	no change	-0.25741
ENSG00000159403	C1R	down	-0.835824	no change	-0.259851
ENSG00000147274	RBMX	down	-0.648683	no change	-0.260862
ENSG00000165917	RAPSN	down	-0.602022	no change	-0.266454
ENSG00000124145	SDC4	down	-0.972492	no change	-0.266702
ENSG00000138760	SCARB2	down	-1.21591	no change	-0.269414
ENSG00000129422	MTUS1	down	-0.648611	no change	-0.270254
ENSG00000174628	IQCK	down	-0.755323	no change	-0.27277
ENSG00000124103	FAM209A	down	-0.712025	no change	-0.277228
ENSG00000087074	PPP1R15A	down	-0.86097	no change	-0.2826
ENSG00000198691	ABCA4	down	-0.590013	no change	-0.289968
ENSG00000130066	SAT1	down	-1.03074	no change	-0.29667
ENSG00000172795	DCP2	down	-1.13373	no change	-0.303489
ENSG00000109861	CTSC	down	-0.800587	no change	-0.303624
ENSG00000125538	IL1B	down	-0.863281	no change	-0.306666
ENSG00000145495	MARCH6	down	-0.943931	no change	-0.310914
ENSG00000091490	SEL1L3	down	-0.876902	no change	-0.320645
ENSG00000122861	PLAU	down	-1.6719	no change	-0.328528
ENSG00000136451	VEZF1	down	-0.619338	no change	-0.332803
ENSG00000115295	CLIP4	down	-1.02522	no change	-0.338554
ENSG00000185022	MAFF	down	-0.913989	no change	-0.342925
ENSG00000156504	FAM122B	down	-0.727482	no change	-0.347389
ENSG00000186665	C17orf58	down	-1.35983	no change	-0.352708
ENSG00000179862	CITED4	down	-0.69104	no change	-0.3605
ENSG00000161011	SQSTM1	down	-0.756757	no change	-0.367168
ENSG00000161010	C5orf45	down	-0.756757	no change	-0.367168
ENSG00000109814	UGDH	down	-0.877355	no change	-0.377084
ENSG00000172594	SMPDL3A	down	-0.785472	no change	-0.386344
ENSG00000231989	PPP1R2P3	down	-0.843764	no change	-0.388755
ENSG00000134109	EDEM1	down	-0.627959	no change	-0.389266
ENSG00000184203	PPP1R2	down	-0.939806	no change	-0.395637
ENSG00000259256	RP11-838N2.3	down	-0.64282	no change	-0.398904
ENSG00000198431	TXNRD1	down	-0.809464	no change	-0.399151
ENSG00000197063	MAFG	down	-0.597899	no change	-0.409773
ENSG00000226444	ACTR3BP6	down	-0.611279	no change	-0.41365
ENSG00000215713	CU179654.1	down	-0.611279	no change	-0.41365
ENSG00000161860	SYCE2	down	-0.636051	no change	-0.424615
ENSG00000135454	B4GALNT1	down	-1.17101	no change	-0.427619
ENSG00000164292	RHOBTB3	down	-0.901248	no change	-0.434355
ENSG00000143799	PARP1	down	-0.645388	no change	-0.438313
ENSG00000086062	B4GALT1	down	-0.857824	no change	-0.441963
ENSG00000133466	C1QTNF6	down	-0.585131	no change	-0.445551
ENSG00000196459	TRAPPC2	down	-0.613794	no change	-0.445551
ENSG00000001084	GCLC	down	-0.621637	no change	-0.445551
ENSG00000124532	MRS2	down	-0.6493	no change	-0.445551
ENSG00000196227	FAM217B	down	-0.664527	no change	-0.445551
ENSG00000188419	CHM	down	-0.679164	no change	-0.445551
ENSG00000152270	PDE3B	down	-0.686829	no change	-0.445551
ENSG00000160209	PDXK	down	-0.695638	no change	-0.445551
ENSG00000110911	SLC11A2	down	-0.70448	no change	-0.445551
ENSG00000186684	CYP27C1	down	-0.707775	no change	-0.445551
ENSG00000164031	DNAJB14	down	-0.709118	no change	-0.445551
ENSG00000140750	ARHGAP17	down	-0.728568	no change	-0.445551
ENSG00000115762	PLEKHB2	down	-0.731744	no change	-0.445551
ENSG00000097033	SH3GLB1	down	-0.760096	no change	-0.445551
ENSG00000181904	C5orf24	down	-0.768276	no change	-0.445551
ENSG00000083799	CYLD	down	-0.795238	no change	-0.445551
ENSG00000121749	TBC1D15	down	-0.814172	no change	-0.445551
ENSG00000066427	ATXN3	down	-0.821434	no change	-0.445551
ENSG00000073009	IKBKG	down	-0.827244	no change	-0.445551
ENSG00000108256	NUFIP2	down	-0.843399	no change	-0.445551
ENSG00000146676	PURB	down	-0.915711	no change	-0.445551
ENSG00000124209	RAB22A	down	-0.938237	no change	-0.445551
ENSG00000163694	RBM47	down	-1.11152	no change	-0.445551
ENSG00000181019	NQO1	down	-1.17553	no change	-0.445551
ENSG00000198363	ASPH	down	-1.23524	no change	-0.445551
ENSG00000124783	SSR1	down	-0.797287	no change	-0.455811
ENSG00000113441	LNPEP	down	-0.649919	no change	-0.459705
ENSG00000213702	AC008865.1	down	-0.649919	no change	-0.459705
ENSG00000182326	C1S	down	-1.17232	no change	-0.476112
ENSG00000183508	FAM46C	down	-0.601678	no change	-0.485911
ENSG00000165997	ARL5B	down	-0.736236	no change	-0.494469
ENSG00000118523	CTGF	down	-0.880413	no change	-0.497082
ENSG00000085276	MECOM	down	-0.829024	no change	-0.499584
ENSG00000146278	PNRC1	down	-0.661362	no change	-0.499686
ENSG00000144802	NFKBIZ	down	-0.874517	no change	-0.506166
ENSG00000081052	COL4A4	down	-0.592208	no change	-0.509429
ENSG00000113552	GNPDA1	down	-0.59829	no change	-0.511656
ENSG00000255150	EID3	down	-0.794299	no change	-0.52307
ENSG00000087842	PIR	down	-0.622446	no change	-0.527771
ENSG00000253276	CCDC71L	down	-0.662228	no change	-0.542028
ENSG00000258947	RP11-566K11.2	down	-0.624132	no change	-0.547083
ENSG00000258839	MC1R	down	-0.624132	no change	-0.547083
ENSG00000256390	AC092143.2	down	-0.624132	no change	-0.547083
ENSG00000259006	RP11-566K11.4	down	-0.624132	no change	-0.547083
ENSG00000104723	TUSC3	down	-0.829499	no change	-0.558416
ENSG00000198286	CARD11	down	-0.649408	no change	-0.565744
ENSG00000181722	ZBTB20	down	-0.626956	no change	-0.710701
ENSG00000232295	RP11-154D6.1	down	-0.956009	no change	-0.756867
ENSG00000118503	TNFAIP3	down	-1.30751	no change	-0.844095
ENSG00000187955	COL14A1	down	-0.617909	uncertain
ENSG00000243660	ZNF487P	down	-0.621851	uncertain
ENSG00000134909	ARHGAP32	down	-0.65607	uncertain
ENSG00000143921	ABCG8	down	-0.65867	uncertain
ENSG00000107099	DOCK8	down	-0.665693	uncertain
ENSG00000180182	MED14	down	-0.66754	uncertain
ENSG00000137776	SLTM	down	-0.723997	uncertain
ENSG00000171564	FGB	down	-0.787171	uncertain
ENSG00000183011	LSMD1	down	-0.84842	uncertain
ENSG00000175390	EIF3F	down	-0.873231	uncertain
ENSG00000006576	PHTF2	down	-1.00411	uncertain
ENSG00000082438	COBLL1	down	-1.01967	uncertain
ENSG00000147475	ERLIN2	down	-1.05642	uncertain
ENSG00000225879	RP3-495K2.3	down	-1.13869	uncertain
ENSG00000153904	DDAH1	down	-0.897921	up	0.903739
ENSG00000124942	AHNAK	down	-0.75297	up	0.895824
ENSG00000105971	CAV2	down	-0.91042	up	0.700371
